# Supplementary material
Source: PubMed Central journal article supplement (PMC2727417)
Supplement: blood-2009-04-215269_1.pdf [file blood-2009-04-215269_1.pdf]

| SNP        | position in ZNF366 | BP         | major | minor | MAF   | beta  | se   | p     |
|------------|--------------------|------------|-------|-------|-------|-------|------|-------|
| rs11750874 |                    | 71 726 098 | C     | A     | 11.1% | 0.05  | 0.07 | 0.42  |
| rs4703854  |                    | 71 729 219 | T     | C     | 23.8% | 0.07  | 0.05 | 0.14  |
| rs4703855  |                    | 71 729 655 | C     | T     | 31.5% | -0.11 | 0.04 | 0.009 |
| rs10040192 |                    | 71 731 636 | T     | C     | 49.6% | -0.11 | 0.04 | 0.005 |
| rs7445013  |                    | 71 733 733 | A     | G     | 46.3% | -0.13 | 0.04 | 0.001 |
| rs2338216  |                    | 71 737 570 | C     | T     | 46.2% | -0.12 | 0.04 | 0.002 |
| rs16878312 |                    | 71 741 140 | C     | A     | 29.8% | 0.06  | 0.04 | 0.14  |
| rs6452453  |                    | 71 748 955 | A     | G     | 23.9% | 0.10  | 0.05 | 0.043 |
| rs7723734  |                    | 71 753 361 | A     | C     | 32.7% | -0.10 | 0.04 | 0.021 |
| rs13180645 |                    | 71 755 940 | G     | A     | 8.1%  | 0.10  | 0.08 | 0.19  |
| rs4703872  | flanking_3UTR      | 71 759 400 | C     | T     | 46.3% | -0.13 | 0.04 | 0.002 |
| rs12054750 | flanking_3UTR      | 71 764 977 | G     | A     | 46.2% | -0.12 | 0.04 | 0.004 |
| rs6452473  | intron             | 71 776 850 | G     | T     | 12.7% | 0.05  | 0.06 | 0.45  |
| rs17378840 | intron             | 71 777 912 | G     | A     | 26.2% | 0.05  | 0.05 | 0.25  |
| rs10043368 | intron             | 71 779 078 | A     | G     | 43.1% | 0.10  | 0.04 | 0.017 |
| rs13177417 | intron             | 71 779 710 | C     | T     | 38.5% | -0.03 | 0.04 | 0.41  |
| rs10068109 | intron             | 71 779 955 | G     | A     | 12.4% | 0.05  | 0.06 | 0.43  |
| rs10070001 | intron             | 71 780 420 | G     | T     | 29.8% | -0.06 | 0.04 | 0.20  |
| rs13189566 | intron             | 71 782 557 | C     | T     | 13.1% | -0.02 | 0.06 | 0.80  |
| rs16878635 | intron             | 71 783 204 | C     | T     | 18.8% | -0.09 | 0.05 | 0.065 |
| rs3112482  | intron             | 71 786 656 | C     | T     | 6.7%  | -0.11 | 0.09 | 0.22  |
