# Supplementary material
Source: PubMed Central journal article supplement (PMC2727417)
Supplement: blood-2009-04-215269_2.pdf [file blood-2009-04-215269_2.pdf]

| SNP        | position in PTPRD | BP        | major | minor | MAF   | beta  | se   | p     |
|------------|-------------------|-----------|-------|-------|-------|-------|------|-------|
| rs7022702  | intron            | 8 966 241 | G     | A     | 19.2% | -0.07 | 0.05 | 0.190 |
| rs17586734 | intron            | 8 967 444 | A     | G     | 25.1% | 0.02  | 0.05 | 0.637 |
| rs7024787  | intron            | 8 969 016 | T     | C     | 24.4% | 0.03  | 0.05 | 0.533 |
| rs12554851 | intron            | 8 970 881 | C     | T     | 3.3%  | -0.21 | 0.11 | 0.056 |
| rs1036278  | intron            | 8 971 644 | A     | C     | 43.8% | 0.02  | 0.04 | 0.589 |
| rs10511515 | intron            | 8 972 266 | T     | C     | 39.1% | 0.04  | 0.04 | 0.373 |
| rs10816027 | intron            | 8 972 620 | C     | A     | 19.5% | -0.07 | 0.05 | 0.145 |
| rs4380999  | intron            | 8 974 647 | T     | C     | 39.0% | 0.04  | 0.04 | 0.354 |
| rs9299083  | intron            | 8 977 930 | T     | C     | 25.0% | 0.02  | 0.05 | 0.710 |
| rs2039331  | intron            | 8 978 375 | T     | C     | 21.4% | -0.07 | 0.05 | 0.182 |
| rs9299084  | intron            | 8 983 027 | T     | C     | 42.4% | 0.01  | 0.04 | 0.759 |
| rs1331665  | intron            | 8 986 113 | G     | T     | 39.2% | -0.09 | 0.04 | 0.028 |
| rs10977429 | intron            | 8 986 408 | T     | C     | 6.5%  | 0.01  | 0.09 | 0.950 |
| rs13285582 | intron            | 8 986 425 | C     | T     | 17.1% | -0.09 | 0.05 | 0.079 |
| rs10977432 | intron            | 8 989 697 | C     | T     | 27.7% | 0.11  | 0.04 | 0.010 |
| rs973117   | intron            | 8 990 033 | C     | A     | 34.0% | 0.08  | 0.04 | 0.049 |
| rs7871755  | intron            | 8 990 709 | C     | A     | 37.0% | -0.11 | 0.04 | 0.010 |
| rs10511519 | intron            | 8 991 207 | T     | C     | 34.7% | 0.1   | 0.04 | 0.023 |
| rs10816028 | intron            | 8 991 239 | C     | T     | 45.5% | 0.09  | 0.04 | 0.025 |
| rs10511520 | intron            | 8 991 538 | T     | C     | 13.8% | 0.02  | 0.06 | 0.699 |
| rs7040386  | intron            | 8 993 282 | T     | G     | 41.5% | -0.04 | 0.04 | 0.323 |
| rs12006331 | intron            | 8 993 758 | T     | G     | 6.1%  | -0.15 | 0.09 | 0.073 |
| rs17587560 | intron            | 8 994 122 | A     | G     | 24.1% | 0     | 0.05 | 0.974 |
| rs1331662  | intron            | 9 000 662 | T     | C     | 14.8% | -0.02 | 0.06 | 0.755 |
| rs613613   | intron            | 9 004 274 | C     | T     | 30.2% | 0.03  | 0.04 | 0.553 |
| rs424051   | intron            | 9 004 740 | G     | A     | 38.4% | 0.02  | 0.04 | 0.615 |
| rs440238   | intron            | 9 006 071 | C     | A     | 39.9% | 0.01  | 0.04 | 0.817 |
| rs17664375 | intron            | 9 006 897 | G     | A     | 38.6% | 0     | 0.04 | 0.930 |
| rs17587734 | intron            | 9 008 296 | A     | G     | 38.7% | 0     | 0.04 | 0.949 |
| rs7029807  | intron            | 9 008 656 | G     | T     | 15.3% | 0.01  | 0.06 | 0.850 |
| rs12348476 | flanking_5UTR     | 9 010 101 | G     | A     | 38.4% | 0     | 0.04 | 0.970 |
| rs378363   | flanking_5UTR     | 9 010 223 | T     | C     | 23.1% | 0.01  | 0.05 | 0.897 |
| rs13287915 | flanking_5UTR     | 9 010 987 | T     | G     | 19.7% | 0.01  | 0.05 | 0.893 |
| rs640391   | flanking_5UTR     | 9 012 205 | T     | C     | 15.6% | -0.02 | 0.06 | 0.775 |
| rs7875273  | flanking_5UTR     | 9 013 522 | T     | C     | 45.1% | 0.01  | 0.04 | 0.761 |
| rs12686090 | flanking_5UTR     | 9 014 254 | G     | T     | 39.8% | 0     | 0.04 | 0.905 |
| rs540259   | flanking_5UTR     | 9 016 157 | C     | T     | 46.4% | -0.02 | 0.04 | 0.611 |
